# Supplementary material
Source: publisher figshare collection journal article supplement (https://frontiersin.figshare.com/ndownloader/files/13392845)
Supplement: Supplementary file [file 13392845]

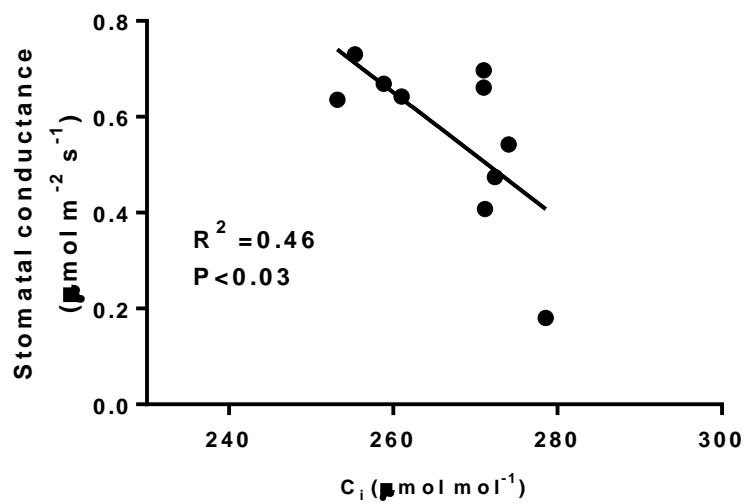

Supplementary Figure S1: Relationship between Internal carbon ( $C_i$ ) and stomatal conductance in five cotton genotypes in experiment 3 under 2.65 and 3.26 VPD conditions.
